# Supplementary material
Source: ML conference proceedings conference paper supplement (https://proceedings.neurips.cc/paper_files/paper/2014/hash/aff1621254f7c1be92f64550478c56e6-Abstract.html)
Supplement: Supplementary file [file aff1621254f7c1be92f64550478c56e6-Supplemental.zip]

---

# Convex Optimization Procedure for Clustering: Theoretical Revisit Supplementary Material

---

**Changbo Zhu**

Department of Electrical and Computer Engineering  
Department of Mathematics  
National University of Singapore  
elezhuc@nus.edu.sg

**Huan Xu**

Department of Mechanical Engineering  
National University of Singapore  
mpexuh@nus.edu.sg

**Chenlei Leng**

Department of Statistics  
University of Warwick  
c.leng@warwick.ac.uk

**Shuicheng Yan**

Department of Electrical and Computer Engineering  
National University of Singapore  
eleyans@nus.edu.sg

## 1 SON

Recall that we are analysing the following convex optimization problem, which we term as SON

$$\hat{\mathbf{X}} = \arg \min_{\mathbf{X} \in \mathbb{R}^{n \times p}} \|\mathbf{A} - \mathbf{X}\|_F^2 + \alpha \sum_{i < j} \|\mathbf{X}_{i\cdot} - \mathbf{X}_{j\cdot}\|_2, \quad (1)$$

where  $\mathbf{A}$  is a given data matrix of dimension  $n \times p$  such that each row is a data point,  $\alpha$  is a tunable parameter,  $\|\cdot\|_F$  denotes the Frobenius norm and  $\mathbf{X}_{i\cdot}$  denotes the  $i$ th row of  $\mathbf{X}$ .

## 2 Proof of Lemma 1

**Lemma 1.** *If the data matrix  $\mathbf{A}$  is column centered, then the optimal solution  $\hat{\mathbf{X}}$  of problem (1) is also column centered. Further more, set  $\mathbf{B} = \mathfrak{D}(\mathbf{A})$  and  $\hat{\mathbf{Y}} = \mathfrak{D}(\hat{\mathbf{X}})$ , we have*

$$\|\mathbf{A} - \hat{\mathbf{X}}\|_F^2 = \sum_{i=1}^{\frac{n(n-1)}{2}} \frac{1}{n} \|\mathbf{B}_{i\cdot} - \hat{\mathbf{Y}}_{i\cdot}\|_2^2.$$

*Proof.* For any  $\mathbf{X} \in \mathbb{R}^{n \times p}$ , set  $\mathbf{Y} = \mathfrak{D}(\mathbf{X})$ , we have

$$\sum_{k=1}^p (\mathbf{X}_{1,k} + \cdots + \mathbf{X}_{n,k}) (\mathbf{X}_{1,k} + \cdots + \mathbf{X}_{n,k}) = \sum_{k=1}^p \left( \sum_{i=1}^n \mathbf{X}_{i,k}^2 + 2 \sum_{1 \leq i < j \leq n} \mathbf{X}_{i,k} \mathbf{X}_{j,k} \right),$$

which implies that

$$2 \sum_{k=1}^p \sum_{1 \leq i < j \leq n} \mathbf{X}_{i,k} \mathbf{X}_{j,k} = \sum_{k=1}^p \left( (\mathbf{X}_{1,k} + \cdots + \mathbf{X}_{n,k})^2 - \sum_{i=1}^n \mathbf{X}_{i,k}^2 \right).$$

Similarly, we have

$$2 \sum_{k=1}^p \sum_{1 \leq i < j \leq n} \mathbf{A}_{i,k} \mathbf{A}_{j,k} = \sum_{k=1}^p \left( (\mathbf{A}_{1,k} + \cdots + \mathbf{A}_{n,k})^2 - \sum_{i=1}^n \mathbf{A}_{i,k}^2 \right).$$

Then, because  $\mathbf{A}$  is column centered, we get

$$\begin{aligned} 0 &= \sum_{k=1}^p (\mathbf{A}_{1,k} + \cdots + \mathbf{A}_{n,k}) (\mathbf{X}_{1,k} + \cdots + \mathbf{X}_{n,k}) \\ &= \sum_{k=1}^p \left( \sum_{1 \leq i < j \leq n} (\mathbf{X}_{i,k} \mathbf{A}_{j,k} + \mathbf{A}_{i,k} \mathbf{X}_{j,k}) + \sum_{i=1}^n \mathbf{A}_{i,k} \mathbf{X}_{i,k} \right), \end{aligned}$$

which implies directly that

$$\begin{aligned} 2 \sum_{k=1}^p \sum_{1 \leq i < j \leq n} (-\mathbf{X}_{i,k} \mathbf{A}_{j,k} - \mathbf{A}_{i,k} \mathbf{X}_{j,k}) \\ = \sum_{k=1}^p \left( -2(\mathbf{X}_{1,k} + \cdots + \mathbf{X}_{n,k})(\mathbf{A}_{1,k} + \cdots + \mathbf{A}_{n,k}) + 2 \sum_{i=1}^n \mathbf{A}_{i,k} \mathbf{X}_{i,k} \right). \end{aligned}$$

Next, we can see that

$$\begin{aligned} &2 \sum_{k=1}^p \sum_{1 \leq i < j \leq n} (\mathbf{X}_{i,k} \mathbf{X}_{j,k} + \mathbf{A}_{i,k} \mathbf{A}_{j,k} - \mathbf{X}_{i,k} \mathbf{A}_{j,k} - \mathbf{A}_{i,k} \mathbf{X}_{j,k}) \\ &= \sum_{k=1}^p \left( (\mathbf{X}_{1,k} + \cdots + \mathbf{X}_{n,k})^2 - \sum_{i=1}^n \mathbf{X}_{i,k}^2 \right) \\ &\quad + \sum_{k=1}^p \left( (\mathbf{A}_{1,k} + \cdots + \mathbf{A}_{n,k})^2 - \sum_{i=1}^n \mathbf{A}_{i,k}^2 \right) \\ &\quad + \sum_{k=1}^p \left( -2(\mathbf{X}_{1,k} + \cdots + \mathbf{X}_{n,k})(\mathbf{A}_{1,k} + \cdots + \mathbf{A}_{n,k}) + 2 \sum_{i=1}^n \mathbf{A}_{i,k} \mathbf{X}_{i,k} \right) \\ &= \sum_{k=1}^p \left( -\sum_{i=1}^n \mathbf{X}_{i,k}^2 - \sum_{i=1}^n \mathbf{A}_{i,k}^2 + 2 \sum_{i=1}^n \mathbf{A}_{i,k} \mathbf{X}_{i,k} \right) + \sum_{k=1}^p (\mathbf{X}_{1,k} + \cdots + \mathbf{X}_{n,k})^2 \\ &= -\|\mathbf{A} - \mathbf{X}\|_F^2 + \sum_{k=1}^p (\mathbf{X}_{1,k} + \cdots + \mathbf{X}_{n,k})^2. \end{aligned}$$

So, we get the following identity

$$\begin{aligned} &\sum_{i=1}^{\frac{n(n-1)}{2}} \|\mathbf{B}_{i\cdot} - \mathbf{Y}_{i\cdot}\|_2^2 \\ &= \sum_{k=1}^p \sum_{1 \leq i < j \leq n} ((\mathbf{X}_{i,k} - \mathbf{X}_{j,k}) - (\mathbf{A}_{i,k} - \mathbf{A}_{j,k}))^2 \\ &= \sum_{k=1}^p \sum_{1 \leq i < j \leq n} ((\mathbf{X}_{i,k} - \mathbf{A}_{i,k})^2 + (\mathbf{X}_{j,k} - \mathbf{A}_{j,k})^2 - 2(\mathbf{X}_{i,k} - \mathbf{A}_{i,k})(\mathbf{X}_{j,k} - \mathbf{A}_{j,k})) \\ &= \sum_{k=1}^p \sum_{i=1}^n (n-1)(\mathbf{X}_{i,k} - \mathbf{A}_{i,k})^2 - 2 \sum_{k=1}^p \sum_{1 \leq i < j \leq n} (\mathbf{X}_{i,k} \mathbf{X}_{j,k} + \mathbf{A}_{i,k} \mathbf{A}_{j,k} - \mathbf{X}_{i,k} \mathbf{A}_{j,k} - \mathbf{A}_{i,k} \mathbf{X}_{j,k}) \\ &= (n-1)\|\mathbf{A} - \mathbf{X}\|_F^2 - 2 \sum_{k=1}^p \sum_{1 \leq i < j \leq n} (\mathbf{X}_{i,k} \mathbf{X}_{j,k} + \mathbf{A}_{i,k} \mathbf{A}_{j,k} - \mathbf{X}_{i,k} \mathbf{A}_{j,k} - \mathbf{A}_{i,k} \mathbf{X}_{j,k}) \\ &= n\|\mathbf{A} - \mathbf{X}\|_F^2 - \sum_{k=1}^p (\mathbf{X}_{1,k} + \cdots + \mathbf{X}_{n,k})^2. \end{aligned}$$

Then, we have

$$\begin{aligned}
& \|\mathbf{A} - \mathbf{X}\|_F^2 + \alpha \sum_{i < j} \|\mathbf{X}_{i\cdot} - \mathbf{X}_{j\cdot}\|_2 \\
&= \sum_{i=1}^{\frac{n(n-1)}{2}} \left( \frac{1}{n} \|\mathbf{B}_{i\cdot} - \mathbf{Y}_{i\cdot}\|_2^2 + \alpha \|\mathbf{Y}_{i\cdot}\|_2 \right) + \frac{1}{n} \sum_{j=1}^p \left( \sum_{i=1}^n \mathbf{X}_{i,j} \right)^2 \\
&\geq \sum_{i=1}^{\frac{n(n-1)}{2}} \left( \frac{1}{n} \|\mathbf{B}_{i\cdot} - \mathbf{Y}_{i\cdot}\|_2^2 + \alpha \|\mathbf{Y}_{i\cdot}\|_2 \right),
\end{aligned}$$

where the equality holds if and only if  $\mathbf{X}$  is column centered.

Next, we prove that  $\hat{\mathbf{X}}$  is column centered by contradiction. Suppose that  $\hat{\mathbf{X}}$  is not column centered, then we can find a column centered  $\bar{\mathbf{X}} \in \mathbb{R}^{n \times p}$  s.t.  $\hat{\mathbf{Y}} = \mathfrak{D}(\hat{\mathbf{X}}) = \mathfrak{D}(\bar{\mathbf{X}})$ . Then, we have

$$\begin{aligned}
& \|\mathbf{A} - \hat{\mathbf{X}}\|_F^2 + \alpha \sum_{i < j} \|\hat{\mathbf{X}}_{i\cdot} - \hat{\mathbf{X}}_{j\cdot}\|_2 \\
&= \sum_{i=1}^{\frac{n(n-1)}{2}} \left( \frac{1}{n} \|\mathbf{B}_{i\cdot} - \hat{\mathbf{Y}}_{i\cdot}\|_2^2 + \alpha \|\hat{\mathbf{Y}}_{i\cdot}\|_2 \right) + \frac{1}{n} \sum_{j=1}^p \left( \sum_{i=1}^n \hat{\mathbf{X}}_{i,j} \right)^2 \\
&> \sum_{i=1}^{\frac{n(n-1)}{2}} \left( \frac{1}{n} \|\mathbf{B}_{i\cdot} - \hat{\mathbf{Y}}_{i\cdot}\|_2^2 + \alpha \|\hat{\mathbf{Y}}_{i\cdot}\|_2 \right) \\
&= \|\mathbf{A} - \bar{\mathbf{X}}\|_F^2 + \alpha \sum_{i < j} \|\bar{\mathbf{X}}_{i\cdot} - \bar{\mathbf{X}}_{j\cdot}\|_2,
\end{aligned}$$

which contradicts the optimality of  $\hat{\mathbf{X}}$ . When  $\hat{\mathbf{X}}$  is column centered, the following identity follows easily

$$\begin{aligned}
n \|\mathbf{A} - \hat{\mathbf{X}}\|_F^2 &= \sum_{i=1}^{\frac{n(n-1)}{2}} \|\mathbf{B}_{i\cdot} - \hat{\mathbf{Y}}_{i\cdot}\|_2^2 + \sum_{k=1}^p (\hat{\mathbf{X}}_{1,k} + \dots + \hat{\mathbf{X}}_{n,k})^2 \\
&= \sum_{i=1}^{\frac{n(n-1)}{2}} \|\mathbf{B}_{i\cdot} - \hat{\mathbf{Y}}_{i\cdot}\|_2^2.
\end{aligned}$$

□

**Remark:** following directly from the proof of Lemma 1, for any column centered matrices  $\mathbf{G}$  and  $\mathbf{H}$  in space  $\mathbb{R}^{n \times p}$ . Set  $\tilde{\mathbf{G}} = \mathfrak{D}(\mathbf{G})$ ,  $\tilde{\mathbf{H}} = \mathfrak{D}(\mathbf{H})$  we have

$$\|\mathbf{G} - \mathbf{H}\|_F^2 = \sum_{i=1}^{\frac{n(n-1)}{2}} \frac{1}{n} \|\tilde{\mathbf{G}}_{i\cdot} - \tilde{\mathbf{H}}_{i\cdot}\|_2^2.$$

### 3 Proof of Lemma 2

**Lemma 2.** Given a column centered data matrix  $\mathbf{A}$ , set  $\mathbf{B} = \mathfrak{D}(\mathbf{A})$  and  $\mathbb{S} = \{\mathbf{Z} \in \mathbb{R}^{\binom{n}{2} \times p} \mid \Omega \mathbf{Z}_{\cdot j} = 0, 1 \leq j \leq p\}$ . Then, we have

$$\hat{\mathbf{X}} = \arg \min_{\mathbf{X} \in \mathbb{R}^{n \times p}} \|\mathbf{A} - \mathbf{X}\|_F^2 + \alpha \sum_{i < j} \|\mathbf{X}_{i\cdot} - \mathbf{X}_{j\cdot}\|_2 \quad (2)$$

$$\iff \mathfrak{D}(\hat{\mathbf{X}}) = \arg \min_{\mathbf{Y} \in \mathbb{S}} \sum_{i=1}^{\frac{n(n-1)}{2}} \left( \frac{1}{n} \|\mathbf{B}_{i\cdot} - \mathbf{Y}_{i\cdot}\|_2^2 + \alpha \|\mathbf{Y}_{i\cdot}\|_2 \right). \quad (3)$$

*Proof.* Set  $\mathbb{T} = \{\mathbf{X} \in \mathbb{R}^{n \times p} \mid \mathbf{X} \text{ is column centered}\}$ . Because  $\mathbf{A}$  is column centered, we have that the optimal solution  $\hat{\mathbf{X}}$  is also column centered by Lemma 1. So, we get

$$\begin{aligned}\hat{\mathbf{X}} &= \arg \min_{\mathbf{X} \in \mathbb{R}^{n \times p}} \|\mathbf{A} - \mathbf{X}\|_F^2 + \alpha \sum_{i < j} \|\mathbf{X}_{i\cdot} - \mathbf{X}_{j\cdot}\|_2 \\ \iff \hat{\mathbf{X}} &= \arg \min_{\mathbf{X} \in \mathbb{T}} \|\mathbf{A} - \mathbf{X}\|_F^2 + \alpha \sum_{i < j} \|\mathbf{X}_{i\cdot} - \mathbf{X}_{j\cdot}\|_2.\end{aligned}$$

Set  $\hat{\mathbf{Y}} = \mathfrak{D}(\hat{\mathbf{X}})$ , then again by Lemma 1, we have the following equality

$$\|\mathbf{A} - \hat{\mathbf{X}}\|_F^2 + \alpha \sum_{i < j} \|\hat{\mathbf{X}}_{i\cdot} - \hat{\mathbf{X}}_{j\cdot}\|_2 = \sum_{i=1}^{\frac{n(n-1)}{2}} \left( \frac{1}{n} \|\mathbf{B}_{i\cdot} - \hat{\mathbf{Y}}_{i\cdot}\|_2^2 + \alpha \|\hat{\mathbf{Y}}_{i\cdot}\|_2 \right).$$

Indeed, it is this identity that gives us a hint to consider the following problem instead,

$$\hat{\mathbf{Y}} = \arg \min_{\mathbf{Y}} \sum_{i=1}^{\frac{n(n-1)}{2}} \left( \frac{1}{n} \|\mathbf{B}_{i\cdot} - \mathbf{Y}_{i\cdot}\|_2^2 + \alpha \|\mathbf{Y}_{i\cdot}\|_2 \right),$$

where  $\mathbf{Y}$  can not take values from the whole space  $\mathbb{R}^{\binom{n}{2} \times p}$ , because we need  $\mathbf{Y} = \mathfrak{D}(\mathbf{X}^*)$  for some  $\mathbf{X}^* \in \mathbb{T}$ . So, we defined some special matrices in Section 4 to indicate that  $\mathbf{Y} = \mathfrak{D}(\mathbf{X}^*)$ .

By the definition of  $\Omega$  and direct checking, we know that

$$\mathbf{Y} = \mathfrak{D}(\mathbf{X}^*) \text{ for some } \mathbf{X}^* \in \mathbb{T} \iff \mathbf{Y} \in \mathbb{S}.$$

Next, set  $\hat{\mathbf{Y}} = \mathfrak{D}(\hat{\mathbf{X}})$ , we show that  $\hat{\mathbf{X}}$  is the optimal solution of problem (2) if and only if  $\hat{\mathbf{Y}}$  is the optimal solution of problem (3). For all  $\mathbf{Y}' \in \mathbb{S}$ ,  $\exists \mathbf{X}' \in \mathbb{T}$  s.t.  $\mathfrak{D}(\mathbf{X}') = \mathbf{Y}'$ , so we have

$$\begin{aligned}& \sum_{i=1}^{\frac{n(n-1)}{2}} \left( \frac{1}{n} \|\mathbf{B}_{i\cdot} - \mathbf{Y}'_{i\cdot}\|_2^2 + \alpha \|\mathbf{Y}'_{i\cdot}\|_2 \right) \\ &= \|\mathbf{A} - \mathbf{X}'\|_F^2 + \alpha \sum_{i < j} \|\mathbf{X}'_{i\cdot} - \mathbf{X}'_{j\cdot}\|_2 \\ &\geq \|\mathbf{A} - \hat{\mathbf{X}}\|_F^2 + \alpha \sum_{i < j} \|\hat{\mathbf{X}}_{i\cdot} - \hat{\mathbf{X}}_{j\cdot}\|_2 \\ &= \sum_{i=1}^{\frac{n(n-1)}{2}} \left( \frac{1}{n} \|\mathbf{B}_{i\cdot} - \hat{\mathbf{Y}}_{i\cdot}\|_2^2 + \alpha \|\hat{\mathbf{Y}}_{i\cdot}\|_2 \right),\end{aligned}$$

so, we have

$$\hat{\mathbf{Y}} = \arg \min_{\mathbf{Y} \in \mathbb{S}} \sum_{i=1}^{\frac{n(n-1)}{2}} \left( \frac{1}{n} \|\mathbf{B}_{i\cdot} - \mathbf{Y}_{i\cdot}\|_2^2 + \alpha \|\mathbf{Y}_{i\cdot}\|_2 \right).$$

On the contrary, suppose we are given that

$$\bar{\mathbf{Y}} = \arg \min_{\mathbf{Y} \in \mathbb{S}} \sum_{i=1}^{\frac{n(n-1)}{2}} \left( \frac{1}{n} \|\mathbf{B}_{i\cdot} - \mathbf{Y}_{i\cdot}\|_2^2 + \alpha \|\mathbf{Y}_{i\cdot}\|_2 \right).$$

Then,  $\exists \bar{\mathbf{X}} \in \mathbb{T}$  s.t.  $\mathfrak{D}(\bar{\mathbf{X}}) = \bar{\mathbf{Y}}$ .  $\forall \mathbf{X}' \in \mathbb{T}$ , denote  $\mathbf{Y}' = \mathfrak{D}(\mathbf{X}')$ , we have

$$\begin{aligned} & \|\mathbf{A} - \mathbf{X}'\|_F^2 + \alpha \sum_{i < j} \|\mathbf{X}'_{i\cdot} - \mathbf{X}'_{j\cdot}\|_2 \\ &= \sum_{i=1}^{\frac{n(n-1)}{2}} \left( \frac{1}{n} \|\mathbf{B}_{i\cdot} - \mathbf{Y}'_{i\cdot}\|_2^2 + \alpha \|\mathbf{Y}'_{i\cdot}\|_2 \right) \\ &\geq \sum_{i=1}^{\frac{n(n-1)}{2}} \left( \frac{1}{n} \|\mathbf{B}_{i\cdot} - \bar{\mathbf{Y}}_{i\cdot}\|_2^2 + \alpha \|\bar{\mathbf{Y}}_{i\cdot}\|_2 \right) \\ &= \|\mathbf{A} - \bar{\mathbf{X}}\|_F^2 + \alpha \sum_{i < j} \|\bar{\mathbf{X}}_{i\cdot} - \bar{\mathbf{X}}_{j\cdot}\|_2, \end{aligned}$$

so, we get

$$\bar{\mathbf{X}} = \arg \min_{\mathbf{X} \in \mathbb{T}} \|\mathbf{A} - \mathbf{X}\|_F^2 + \alpha \sum_{i < j} \|\mathbf{X}_{i\cdot} - \mathbf{X}_{j\cdot}\|_2.$$

In conclusion, we have showed the following result

$$\begin{aligned} \hat{\mathbf{X}} &= \arg \min_{\mathbf{X} \in \mathbb{T}} \|\mathbf{A} - \mathbf{X}\|_F^2 + \alpha \sum_{i < j} \|\mathbf{X}_{i\cdot} - \mathbf{X}_{j\cdot}\|_2 \\ \iff \mathfrak{D}(\hat{\mathbf{X}}) &= \arg \min_{\mathbf{Y} \in \mathbb{S}} \sum_{i=1}^{\frac{n(n-1)}{2}} \left( \frac{1}{n} \|\mathbf{B}_{i\cdot} - \mathbf{Y}_{i\cdot}\|_2^2 + \alpha \|\mathbf{Y}_{i\cdot}\|_2 \right). \end{aligned}$$

□

#### 4 Proof of Lemma 3

**Lemma 3.** Given  $\mathbf{c}_n \in \mathbb{R}^n$ , i.e.  $\mathbf{c}_n = (c_1, c_2, \dots, c_n)^T$ , s.t.  $\sum_{i=1}^n c_i = 0$  and  $\exists b \in \mathbb{R}, |c_i| \leq b$ . Then  $\exists \mathbf{x} \in \mathbb{R}^{\frac{n(n-1)}{2}}$ , s.t.  $\|\mathbf{x}\|_\infty \leq \frac{2}{n}b$  and  $\mathbf{R}_n^T \mathbf{x} = \mathbf{c}_n$ .

*Proof.* Set

$$\mathbb{F} = \left\{ (x_1, x_2, \dots, x_n)^T \in \mathbb{R}^n \mid \sum_{i=1}^n x_i = 0, 1 \leq j \leq n, |x_j| \leq b \right\},$$

and

$$\mathbb{G} = \left\{ \left( x_1, x_2, \dots, x_{\frac{n(n-1)}{2}} \right)^T \in \mathbb{R}^{\frac{n(n-1)}{2}} \mid 1 \leq i \leq \frac{n(n-1)}{2}, |x_i| \leq \frac{2}{n}b \right\}.$$

Notice that  $\mathbb{F}$  is convex and define  $f : \mathbb{R}^{\frac{n(n-1)}{2}} \mapsto \mathbb{R}^n$  as  $f(\mathbf{x}) = \mathbf{R}_n^T \mathbf{x}$  for any  $\mathbf{x} \in \mathbb{R}^{\frac{n(n-1)}{2}}$ . Then, we want to show that for all  $\mathbf{c}_n \in \mathbb{F}$ , exists  $\mathbf{x} \in \mathbb{G}$  such that  $f(\mathbf{x}) = \mathbf{c}_n$ . Equivalently, we want to show  $f(\mathbb{G}) \supseteq \mathbb{F}$ .

Let  $\mathbf{y} = (y_1, y_2, \dots, y_n)^T \in \mathbb{R}^n$ . If  $n$  is even, set  $y_1 = y_2 = \dots = y_{\frac{n}{2}} = b$  and  $y_{\frac{n}{2}+1} = y_{\frac{n}{2}+2} = \dots = y_n = -b$ . If  $n$  is odd, set  $y_1 = y_2 = \dots = y_{\frac{n-1}{2}} = b$ ,  $y_{\frac{n-1}{2}+1} = y_{\frac{n-1}{2}+2} = \dots = y_{n-1} = -b$  and  $y_n = 0$ . Then, let  $\mathbb{P}_n$  denote the set of all permutations  $\mathbf{p}$  of the sequence of integers  $\{1, 2, \dots, n\}$ . After that, let  $\mathbb{E}$  denote the set of all extreme points of the convex set  $\mathbb{F}$ , then it is easy to see that

$$\mathbb{E} = \left\{ (z_1, z_2, \dots, z_n)^T \in \mathbb{R}^n \mid \exists \mathbf{p} \in \mathbb{P}_n \text{ s.t. } (z_{\mathbf{p}(1)}, z_{\mathbf{p}(2)}, \dots, z_{\mathbf{p}(n)})^T = \mathbf{y} \right\}.$$

In the following, we show that  $\mathbb{E} \subseteq f(\mathbb{G})$ . Given any  $\mathbf{z}_n = (z_1, z_2, \dots, z_n)^T \in \mathbb{E}$  we construct a  $\mathbf{u} \in \mathbb{G}$  s.t.  $\mathbf{R}_n^T \mathbf{u} = \mathbf{z}_n$ .

Denote

$$\mathbf{u} = (u_1^{n-1}, u_2^{n-1}, \dots, u_{n-1}^{n-1}, u_1^{n-2}, \dots, u_{n-2}^{n-2}, \dots, u_1^1)^T.$$

For  $1 \leq i < j \leq n$ , when  $n$  is even set

$$u_j^i = \begin{cases} \frac{2}{n}b & : z_{n-i} > z_{n-i+j} \\ -\frac{2}{n}b & : z_{n-i} < z_{n-i+j} \\ 0 & : z_{n-i} = z_{n-i+j} \end{cases}$$

and when  $n$  is odd set

$$u_j^i = \begin{cases} \frac{2}{n+1}b & : z_{n-i} > z_{n-i+j} \\ -\frac{2}{n+1}b & : z_{n-i} < z_{n-i+j} \\ 0 & : z_{n-i} = z_{n-i+j} \end{cases}$$

By this construction, checking directly that  $\mathbf{u} \in \mathbb{G}$  and  $\mathbf{R}_n^T \mathbf{u} = \mathbf{z}_n$ . So, we have  $\mathbb{E} \subseteq f(\mathbb{G})$ . Next, since  $f$  is an affine function and the image of a convex set under an affine function is convex, we have  $f(\mathbb{G})$  is convex. So, we have  $\mathbb{F} = \{\text{convex hull of } \mathbb{E}\} \subseteq f(\mathbb{G})$ .  $\square$

## 5 Proof of Theorem 1

**Theorem 1.** Given a column centered data matrix  $\mathbf{A}$  of dimension  $n \times p$ , where each row is arbitrarily picked from either cube  $\mathbb{C}^1$  or cube  $\mathbb{C}^2$  and there are totally  $n_i$  rows chosen from  $\mathbb{C}^i$  for  $i = 1, 2$ , if  $w_{1,2} < d_{1,2}$ , then by choosing the parameter  $\alpha \in \mathbb{R}$  such that  $w_{1,2} < \frac{n}{2}\alpha < d_{1,2}$ , we have the following:

1. SON can correctly determine the cluster membership of  $\mathbf{A}$ ;
2. Rearrange the rows of  $\mathbf{A}$  such that

$$\mathbf{A} = \begin{pmatrix} \mathbf{A}^1 \\ \mathbf{A}^2 \end{pmatrix} \text{ and } \mathbf{A}^i = \begin{pmatrix} \mathbf{A}_{1,\cdot}^i \\ \mathbf{A}_{2,\cdot}^i \\ \vdots \\ \mathbf{A}_{n_i,\cdot}^i \end{pmatrix}, \quad (4)$$

where for  $i = 1, 2$  and  $j = 1, 2, \dots, n_i$ ,  $\mathbf{A}_{j,\cdot}^i = (\mathbf{A}_{j,1}^i, \mathbf{A}_{j,2}^i, \dots, \mathbf{A}_{j,p}^i) \in \mathbb{C}^i$ . Then, the optimal solution  $\hat{\mathbf{X}}$  of problem (1) is given by

$$\hat{\mathbf{X}}_i = \begin{cases} \frac{n_2}{n_1+n_2} \left( 1 - \frac{n\alpha}{2\|\mathfrak{M}(\mathfrak{D}_2(\mathbf{A}^1, \mathbf{A}^2))\|_2} \right) \mathfrak{M}(\mathfrak{D}_2(\mathbf{A}^1, \mathbf{A}^2)), & \text{if } \mathbf{A}_i \in \mathbb{C}^1; \\ -\frac{n_1}{n_1+n_2} \left( 1 - \frac{n\alpha}{2\|\mathfrak{M}(\mathfrak{D}_2(\mathbf{A}^1, \mathbf{A}^2))\|_2} \right) \mathfrak{M}(\mathfrak{D}_2(\mathbf{A}^1, \mathbf{A}^2)), & \text{if } \mathbf{A}_i \in \mathbb{C}^2. \end{cases}$$

*Proof.* WLOG, we let

$$\mathbf{A} = \begin{pmatrix} \mathbf{A}^1 \\ \mathbf{A}^2 \end{pmatrix} \text{ and } \mathbf{A}^i = \begin{pmatrix} \mathbf{A}_{1,\cdot}^i \\ \mathbf{A}_{2,\cdot}^i \\ \vdots \\ \mathbf{A}_{n_i,\cdot}^i \end{pmatrix},$$

where for  $i = 1, 2$  and  $j = 1, 2, \dots, n_i$ ,  $\mathbf{A}_{j,\cdot}^i = (\mathbf{A}_{j,1}^i, \mathbf{A}_{j,2}^i, \dots, \mathbf{A}_{j,p}^i) \in \mathbb{C}^i$ .

**Step 1:** In this step, we derive an equivalent form of problem (1) and give optimality conditions. For convenience, set  $\mathbf{B}^{(1,2)} = \mathfrak{D}_2(\mathbf{A}^1, \mathbf{A}^2)$ ,  $\mathbf{B}^1 = \mathfrak{D}_1(\mathbf{A}^1)$ ,  $\mathbf{B}^2 = \mathfrak{D}_1(\mathbf{A}^2)$ ,  $\mathbb{V} = \{\mathbf{y} \in \mathbb{R}^{\binom{n}{2}} \mid \Omega \mathbf{y} = 0\}$  and  $\mathbb{S} = \{\mathbf{Z} \in \mathbb{R}^{\binom{n}{2} \times p} \mid \Omega \mathbf{Z}_{\cdot j} = 0, 1 \leq j \leq p\}$ . Due to lemma (2), we can focus on the following problem

$$\hat{\mathbf{Y}} = \arg \min_{\mathbf{Y} \in \mathbb{S}} \sum_{i=1}^{\frac{n(n-1)}{2}} \left( \frac{1}{n} \|\mathbf{B}_{i,\cdot} - \mathbf{Y}_{i,\cdot}\|_2^2 + \alpha \|\mathbf{Y}_{i,\cdot}\|_2 \right). \quad (5)$$

We use  $\hat{\mathbf{A}}$  to denote the optimal dual solution of problem (5) which has the same dimension as  $\hat{\mathbf{Y}}$ . Then, by Proposition 6.4.3 in [1] Page 303, we have the following result,  $\hat{\mathbf{Y}}$  and  $\hat{\mathbf{A}}$  are an optimal primal and dual solution pair of (5) if and only if

$$\hat{\mathbf{Y}}_{\cdot j} \in \mathbb{V}, (\hat{\mathbf{A}}_{\cdot j})^T \in \mathbb{V}^\perp, j = 1, 2, \dots, p, \quad (6)$$

and

$$\hat{\mathbf{Y}}_{i \cdot} \in \arg \min_{\mathbf{y} \in \mathbb{R}^p} \left( \frac{1}{n} \|\mathbf{B}_{i \cdot} - \mathbf{y}\|_2^2 + \alpha \|\mathbf{y}\|_2 - \mathbf{y} \hat{\mathbf{A}}_{i \cdot}^T \right), i = 1, 2, \dots, \binom{n}{2}. \quad (7)$$

**Step 2:** In this step, we construct  $\hat{\mathbf{A}}$ . Since  $\mathbf{A}$  is constructed by concatenating matrices  $\mathbf{A}^1$  and  $\mathbf{A}^2$  vertically, we also expect  $\hat{\mathbf{X}}$  to be concatenated by two matrices vertically. Due to the fact that  $\hat{\mathbf{Y}} = \mathfrak{D}(\hat{\mathbf{X}})$ , for  $1 \leq l \leq p$ , we write  $\hat{\mathbf{Y}}$  and  $\hat{\mathbf{A}}$  as the following

$$\hat{\mathbf{A}}_{\cdot l} = \begin{pmatrix} \hat{\mathbf{A}}_{\cdot l}^1 \\ \hat{\mathbf{A}}_{\cdot l}^2 \\ \hat{\mathbf{A}}_{\cdot l}^{(1,2)} \end{pmatrix} \text{ and } \hat{\mathbf{Y}}_{\cdot l} = \begin{pmatrix} \hat{\mathbf{Y}}_{\cdot l}^1 \\ \hat{\mathbf{Y}}_{\cdot l}^2 \\ \hat{\mathbf{Y}}_{\cdot l}^{(1,2)} \end{pmatrix}$$

where  $\hat{\mathbf{A}}_{\cdot l}^i, \hat{\mathbf{Y}}_{\cdot l}^i \in \mathbb{R}^{\binom{n_i}{2}}$  for  $i = 1, 2$  and  $\hat{\mathbf{A}}_{\cdot l}^{(1,2)}, \hat{\mathbf{Y}}_{\cdot l}^{(1,2)} \in \mathbb{R}^{n_1 n_2}$ . Next, we use  $\text{Row}(\Omega)$  to denote the row space of  $\Omega$ , then  $\mathbb{V}^T$  is the same as  $\text{Row}(\Omega)$ .

For notational convenience, given any vector  $\mathbf{v}$ , we use  $\mathbf{v}[i, j], i < j$  to denote a new vector composed of the  $i$ th through  $j$ th element of  $\mathbf{v}$ . By the structure of  $\Omega$ , i.e. there exists a identity submatrix  $\mathbf{I}$  of  $\Omega$  s.t.  $\mathbf{I}$  and  $\Omega$  have the same number of rows, we have  $(\hat{\mathbf{A}}_{\cdot l})^T \in \text{Row}(\Omega)$  is equivalent to the following equalities, i.e. equalities (8) and (9),

$$\mathbf{R}_{n_1-1}^T \left( \hat{\mathbf{A}}_{\cdot l}^1 [n_1 : \binom{n_1}{2}] \right) + \mathbf{S}_{n_2(n_1-1) \times (n_1-1)}^T \left( \hat{\mathbf{A}}_{\cdot l}^{(1,2)} [n_2 + 1 : n_1 n_2] \right) = \hat{\mathbf{A}}_{\cdot l}^1 [1 : n_1 - 1], \quad (8)$$

$$\mathbf{R}_{n_2}^T \hat{\mathbf{A}}_{\cdot l}^2 + \mathbf{W}_{(n_1-1)n_2 \times n_2}^T \hat{\mathbf{A}}_{\cdot l}^{(1,2)} [n_2 + 1 : n_1 n_2] = \hat{\mathbf{A}}_{\cdot l}^{(1,2)} [1 : n_2]. \quad (9)$$

Then, we set

$$\hat{\mathbf{A}}_{m \cdot}^{(1,2)} = \frac{2}{n} \left( \frac{1}{n_1 n_2} \left( \sum_{k=1}^{n_1 n_2} \mathbf{B}_{k \cdot}^{(1,2)} \right) - \mathbf{B}_{m \cdot}^{(1,2)} \right), 1 \leq m \leq n_1 n_2. \quad (10)$$

By moving the left hand side of (8) to the right, we have (8) is equivalent to

$$(-\mathbf{I}_{n_1-1} \mathbf{R}_{n_1-1}^T) \begin{pmatrix} \hat{\mathbf{A}}_{\cdot l}^1 [1 : n_1 - 1] \\ \hat{\mathbf{A}}_{\cdot l}^1 [n_1 : \binom{n_1}{2}] \end{pmatrix} + \mathbf{S}_{n_2(n_1-1) \times (n_1-1)}^T \left( \hat{\mathbf{A}}_{\cdot l}^{(1,2)} [n_2 + 1 : n_1 n_2] \right) = 0. \quad (11)$$

Then, since  $\sum_{m=1}^{n_1 n_2} \hat{\mathbf{A}}_{m \cdot}^{(1,2)} = 0$ , checking directly that we have  $\mathfrak{M} \left( \mathbf{S}_{n_1 n_2 \times n_1}^T \hat{\mathbf{A}}_{\cdot l}^{(1,2)} \right) = 0$  and

$$\left( \mathbf{S}_{n_1 n_2 \times n_1}^T \hat{\mathbf{A}}_{\cdot l}^{(1,2)} \right) [2 : n_1] = \mathbf{S}_{n_2(n_1-1) \times (n_1-1)}^T \left( \hat{\mathbf{A}}_{\cdot l}^{(1,2)} [n_2 + 1 : n_1 n_2] \right).$$

Since  $\mathfrak{M}(\mathbf{R}_{n_1}^T) = 0$ , we get  $\mathfrak{M}(\mathbf{R}_{n_1}^T \hat{\mathbf{A}}_{\cdot l}^1) = 0$  and checking directly that

$$\left( \mathbf{R}_{n_1}^T \hat{\mathbf{A}}_{\cdot l}^1 \right) [2 : n_1] = (-\mathbf{I}_{n_1-1} \mathbf{R}_{n_1-1}^T) \begin{pmatrix} \hat{\mathbf{A}}_{\cdot l}^1 [1 : n_1 - 1] \\ \hat{\mathbf{A}}_{\cdot l}^1 [n_1 : \binom{n_1}{2}] \end{pmatrix} = (-\mathbf{I}_{n_1-1} \mathbf{R}_{n_1-1}^T) \hat{\mathbf{A}}_{\cdot l}^1.$$

So, we have that (11) is equivalent to

$$\mathbf{R}_{n_1}^T \hat{\mathbf{A}}_{\cdot l}^1 + \mathbf{S}_{n_1 n_2 \times n_1}^T \hat{\mathbf{A}}_{\cdot l}^{(1,2)} = 0. \quad (12)$$

For (9), move right hand side to the left, we have

$$\mathbf{R}_{n_2}^T \hat{\mathbf{A}}_{\cdot l}^2 + \mathbf{W}_{n_1 n_2 \times n_2}^T \hat{\mathbf{A}}_{\cdot l}^{(1,2)} = 0. \quad (13)$$

In conclusion, we have showed that  $(\hat{\mathbf{A}}_l)^T \in \text{Row}(\mathbf{\Omega})$  is equivalent to  $\hat{\mathbf{A}}_l$  satisfies equations (12) and (13). After that, checking directly that we have  $\mathfrak{M}(\mathbf{S}_{n_1 n_2 \times n_1}^T \hat{\mathbf{A}}_l^{(1,2)}) = 0$  and  $\mathfrak{M}(\mathbf{W}_{n_1 n_2 \times n_2}^T \hat{\mathbf{A}}_l^{(1,2)}) = 0$ . Because of (10), for  $1 \leq m \leq n_1$ , the  $m$ th entry of the vector  $-(\mathbf{S}_{n_1 n_2 \times n_1}^T \hat{\mathbf{A}}_l^{(1,2)})$  is

$$-\frac{2}{n} \left[ \frac{1}{n_1} \left( \sum_{k=1}^{n_1 n_2} \mathbf{B}_{k,l}^{(1,2)} \right) - \left( \sum_{k=1}^{n_2} \mathbf{B}_{k+n_2(m-1),l}^{(1,2)} \right) \right].$$

Also, for  $1 \leq m \leq n_2$ , we have the  $m$ th entry of the vector  $-(\mathbf{W}_{n_1 n_2 \times n_2}^T \hat{\mathbf{A}}_l^{(1,2)})$  is

$$\frac{2}{n} \left[ \frac{1}{n_2} \left( \sum_{k=1}^{n_1 n_2} \mathbf{B}_{k,l}^{(1,2)} \right) - \left( \sum_{k=0}^{n_1-1} \mathbf{B}_{kn_2+m,l}^{(1,2)} \right) \right].$$

For  $1 \leq i \leq 2$  and  $1 \leq j \leq n_i$ , since  $\mathbf{A}_{j,\cdot}^i = (\mathbf{A}_{j,1}^i, \mathbf{A}_{j,2}^i, \dots, \mathbf{A}_{j,p}^i) \in \mathbb{C}^i$ , we have  $|\mathbf{A}_{j,k}^i| \leq \mu_{ik} + \sigma_{ik}$  for  $1 \leq k \leq p$ . For  $1 \leq m \leq n_1$ , according to a direct calculation we get

$$\begin{aligned} & \left| \frac{2}{n} \left[ \frac{1}{n_1} \left( \sum_{k=1}^{n_1 n_2} \mathbf{B}_{k,l}^{(1,2)} \right) - \left( \sum_{k=1}^{n_2} \mathbf{B}_{k+n_2(m-1),l}^{(1,2)} \right) \right] \right| \\ &= \left| \frac{2}{n} (n_2) \left( \frac{1}{n_1} \left( \sum_{k=1}^{n_1} \mathbf{A}_{k,l}^1 \right) - \mathbf{A}_{m,l}^1 \right) \right| \\ &\leq \frac{2}{n} (n_2) \left( \frac{n_1-1}{n_1} \right) (2\sigma_{1l}). \end{aligned}$$

Similarly, for  $1 \leq m \leq n_2$ , by a direct computation we get

$$\begin{aligned} & \left| \frac{2}{n} \left[ \frac{1}{n_2} \left( \sum_{j=1}^{n_1 n_2} \mathbf{B}_{j,l}^{(1,2)} \right) - \left( \sum_{j=0}^{n_1-1} \mathbf{B}_{jn_2+m,l}^{(1,2)} \right) \right] \right| \\ &= \left| \frac{2}{n} (n_1) \left( \frac{1}{n_2} \left( \sum_{k=1}^{n_2} \mathbf{A}_{k,l}^2 \right) - \mathbf{A}_{m,l}^2 \right) \right| \\ &\leq \frac{2}{n} (n_1) \left( \frac{n_2-1}{n_2} \right) (2\sigma_{2l}). \end{aligned}$$

In conclusion, we have showed that

$$\|\mathbf{R}_{n_1}^T \hat{\mathbf{A}}_l^1\|_\infty \leq \frac{2}{n} (n_2) \frac{(n_1-1)}{n_1} (2\sigma_{1l}),$$

and

$$\|\mathbf{R}_{n_2}^T \hat{\mathbf{A}}_l^2\|_\infty \leq \frac{2}{n} (n_1) \frac{(n_2-1)}{n_2} (2\sigma_{2l}).$$

So, by Lemma 3,  $\exists \hat{\mathbf{A}}_l^1$  satisfying (12) and  $\exists \hat{\mathbf{A}}_l^2$  satisfying (13) s.t. the following holds

$$\|\hat{\mathbf{A}}_l^1\|_\infty \leq \frac{2}{n} (n_2) \frac{(n_1-1)}{n_1^2} (4\sigma_{1l}), \quad (14)$$

and

$$\|\hat{\mathbf{A}}_l^2\|_\infty \leq \frac{2}{n} (n_1) \frac{(n_2-1)}{n_2^2} (4\sigma_{2l}). \quad (15)$$



Up to now, we have constructed a  $\hat{\mathbf{A}}$  of dimension  $\binom{n}{2} \times p$  satisfying equations (12) and (13) s.t.

$$\begin{cases} \hat{\mathbf{A}}_{\cdot l}^1 \text{ satisfies (14), for } 1 \leq l \leq p, \\ \hat{\mathbf{A}}_{\cdot l}^2 \text{ satisfies (15), for } 1 \leq l \leq p, \\ \hat{\mathbf{A}}_{m\cdot}^{(1,2)} = \frac{2}{n} \left( \frac{1}{n_1 n_2} \left( \sum_{k=1}^{n_1 n_2} \mathbf{B}_{k\cdot}^{(1,2)} \right) - \mathbf{B}_{m\cdot}^{(1,2)} \right), \quad 1 \leq m \leq n_1 n_2. \end{cases}$$

**Step 3:** Finally, we construct  $\hat{\mathbf{Y}}$  and show that we can determine the cluster membership of  $\mathbf{A}$  correctly if the conditions in Theorem (1) holds. Set

$$\begin{cases} \hat{\mathbf{Y}}_{\cdot l}^1 = \hat{\mathbf{Y}}_{\cdot l}^2 = 0, \quad 1 \leq l \leq p, \\ \hat{\mathbf{Y}}_{m\cdot}^{(1,2)} = \left( 1 - \frac{n\alpha}{2\|\mathfrak{M}(\mathbf{B}^{(1,2)})\|_2} \right) \left( \mathfrak{M}(\mathbf{B}^{(1,2)}) \right), \quad 1 \leq m \leq n_1 n_2. \end{cases}$$

For each pair of  $\mathbf{B}_{i\cdot}$  and  $\mathbf{A}_{i\cdot}$ , notice that problem (7) is equivalent to

$$\hat{\mathbf{Y}}_{i\cdot} \in \arg \min_{\mathbf{y} \in \mathbb{R}^p} \left( \frac{1}{n} \left\| \left( \frac{n}{2} \mathbf{A}_{i\cdot} + \mathbf{B}_{i\cdot} \right) - \mathbf{y} \right\|_2^2 + \alpha \|\mathbf{y}\|_2 \right), \quad i = 1, 2, \dots, \binom{n}{2}. \quad (16)$$

Then, it is easy to see that the minimizer of (16) is

$$\begin{cases} \left( 1 - \frac{n\alpha}{2\|\frac{n}{2} \mathbf{A}_{i\cdot} + \mathbf{B}_{i\cdot}\|_2} \right) \left( \frac{n}{2} \mathbf{A}_{i\cdot} + \mathbf{B}_{i\cdot} \right) & \text{if } \frac{2}{n} \left\| \frac{n}{2} \mathbf{A}_{i\cdot} + \mathbf{B}_{i\cdot} \right\|_2 > \alpha \\ 0 & \text{if } \frac{2}{n} \left\| \frac{n}{2} \mathbf{A}_{i\cdot} + \mathbf{B}_{i\cdot} \right\|_2 \leq \alpha. \end{cases}$$

Then, according to the  $\mathbf{A}$  we constructed, for  $1 \leq i \leq 2, 1 \leq l \leq \binom{n_i}{2}$  and  $1 \leq h \leq n_1 n_2$ , we have the following

$$\left\| \frac{n}{2} \hat{\mathbf{A}}_{l\cdot}^i + \mathbf{B}_{l\cdot}^i \right\|_2 \leq w_{1,2} < d_{1,2} \leq \left\| \frac{n}{2} \hat{\mathbf{A}}_{h\cdot}^{(1,2)} + \mathbf{B}_{h\cdot}^{(1,2)} \right\|_2.$$

By the construction of  $\hat{\mathbf{A}}$  and  $\hat{\mathbf{Y}}$  together with the choice of  $\alpha$ , conditions (12), (13), (16) are satisfied. Equivalently, conditions (7) and (6) are satisfied, so  $\hat{\mathbf{A}}$  and  $\hat{\mathbf{Y}}$  are an optimal primal and dual solution pair of (5). By the construction of  $\hat{\mathbf{Y}}$ , we have

$$\begin{cases} \hat{\mathbf{Y}}_{k\cdot}^i = 0, \quad 1 \leq i \leq 2, 1 \leq k \leq \binom{n_i}{2}, \\ \hat{\mathbf{Y}}_{m\cdot}^{(1,2)} = \left( 1 - \frac{n\alpha}{2\|\mathfrak{M}(\mathbf{B}^{(1,2)})\|_2} \right) \left( \mathfrak{M}(\mathbf{B}^{(1,2)}) \right), \quad 1 \leq m \leq n_1 n_2, \end{cases} \quad (17)$$

$$\hat{\mathbf{Y}}_{m\cdot}^{(1,2)} = \left( 1 - \frac{n\alpha}{2\|\mathfrak{M}(\mathbf{B}^{(1,2)})\|_2} \right) \left( \mathfrak{M}(\mathbf{B}^{(1,2)}) \right), \quad 1 \leq m \leq n_1 n_2, \quad (18)$$

which means  $\hat{\mathbf{Y}} = \mathfrak{D}(\hat{\mathbf{X}})$ , s.t.

$$\hat{\mathbf{X}} = \begin{pmatrix} \mathbf{X}^1 \\ \mathbf{X}^2 \end{pmatrix} \text{ and } \mathbf{X}^i = \begin{pmatrix} \mathbf{X}_{1\cdot}^i \\ \mathbf{X}_{2\cdot}^i \\ \vdots \\ \mathbf{X}_{n_i\cdot}^i \end{pmatrix},$$

where  $\mathbf{X}_{j\cdot}^i = (\mathbf{X}_{j,1}^i, \mathbf{X}_{j,2}^i, \dots, \mathbf{X}_{j,p}^i) \in \mathbb{C}^i$ ,  $\mathbf{X}_{1\cdot}^i = \mathbf{X}_{2\cdot}^i = \dots = \mathbf{X}_{n_i\cdot}^i$  for  $i = 1, 2$  and  $\mathbf{X}_{k\cdot}^1 \neq \mathbf{X}_{l\cdot}^2$  for  $1 \leq k \leq n_1, 1 \leq l \leq n_2$ .

So, we can determine the cluster membership of  $\mathbf{A}$  correctly when the conditions in Theorem 1 holds. By lemma (1), we know that  $\hat{\mathbf{X}}$  is column centered. Since  $\hat{\mathbf{Y}} = \mathfrak{D}(\hat{\mathbf{X}})$ , by solving the following two linear equalities,

$$\begin{cases} \mathbf{X}_{i\cdot}^1 - \mathbf{X}_{j\cdot}^2 = \left( 1 - \frac{n\alpha}{2\|\mathfrak{M}(\mathbf{B}^{(1,2)})\|_2} \right) \left( \mathfrak{M}(\mathbf{B}^{(1,2)}) \right) \\ n_1 \mathbf{X}_{i\cdot}^1 + n_2 \mathbf{X}_{j\cdot}^2 = 0, \end{cases} \quad (19)$$

$$n_1 \mathbf{X}_{i\cdot}^1 + n_2 \mathbf{X}_{j\cdot}^2 = 0, \quad (20)$$

we get

$$\hat{\mathbf{X}}_{i\cdot} = \begin{cases} \frac{n_2}{n_1+n_2} \left(1 - \frac{n\alpha}{2\|\mathfrak{M}(\mathfrak{D}_2(\mathbf{A}^1, \mathbf{A}^2))\|_2}\right) \mathfrak{M}(\mathfrak{D}_2(\mathbf{A}^1, \mathbf{A}^2)) & \text{if } \mathbf{A}_{i\cdot} \in \mathbb{C}^1; \\ -\frac{n_1}{n_1+n_2} \left(1 - \frac{n\alpha}{2\|\mathfrak{M}(\mathfrak{D}_2(\mathbf{A}^1, \mathbf{A}^2))\|_2}\right) \mathfrak{M}(\mathfrak{D}_2(\mathbf{A}^1, \mathbf{A}^2)) & \text{if } \mathbf{A}_{i\cdot} \in \mathbb{C}^2. \end{cases}$$

□

## 6 Proof of Proposition 1

**Proposition 1. (Isometry Invariant)** *Given a data matrix  $\mathbf{A}$  of dimension  $n \times p$  such that each row of  $\mathbf{A}$  is chosen from some cluster  $\mathbb{C}^i, i = 1, 2, \dots, c$ , and  $f(\cdot)$  an isometry of  $\mathbb{R}^p$ , we have*

$$\begin{aligned} \hat{\mathbf{X}} &= \arg \min_{\mathbf{X} \in \mathbb{R}^{n \times p}} \|\mathbf{A} - \mathbf{X}\|_F^2 + \alpha \sum_{i < j} \|\mathbf{X}_{i\cdot} - \mathbf{X}_{j\cdot}\|_2 \\ \iff f(\hat{\mathbf{X}}) &= \arg \min_{\mathbf{X} \in \mathbb{R}^{n \times p}} \|f(\mathbf{A}) - \mathbf{X}\|_F^2 + \alpha \sum_{i < j} \|\mathbf{X}_{i\cdot} - \mathbf{X}_{j\cdot}\|_2. \end{aligned}$$

*This further implies that if SON successfully determines the cluster membership of  $\mathbf{A}$ , then it also successfully determines the cluster membership of  $f(\mathbf{A})$ .*

*Proof.* Given  $\mathbf{A}$ , let  $\hat{\mathbf{X}}$  be the optimal solution of problem (1), i.e.

$$\hat{\mathbf{X}} = \arg \min_{\mathbf{X} \in \mathbb{R}^{n \times p}} \|\mathbf{A} - \mathbf{X}\|_F^2 + \alpha \sum_{i < j} \|\mathbf{X}_{i\cdot} - \mathbf{X}_{j\cdot}\|_2.$$

Then,  $\hat{\mathbf{X}}$  reveals the cluster-membership of  $\mathbf{A}$ . For any  $\bar{\mathbf{X}} \in \mathbb{R}^{n \times p}$ , we have

$$\begin{aligned} &\|f(\mathbf{A}) - \bar{\mathbf{X}}\|_F^2 + \alpha \sum_{i < j} \|\bar{\mathbf{X}}_{i\cdot} - \bar{\mathbf{X}}_{j\cdot}\|_2 \\ &= \|\mathbf{A} - f^{-1}(\bar{\mathbf{X}})\|_F^2 + \alpha \sum_{i < j} \|f^{-1}(\bar{\mathbf{X}}_{i\cdot}) - f^{-1}(\bar{\mathbf{X}}_{j\cdot})\|_2 \\ &\geq \|\mathbf{A} - \hat{\mathbf{X}}\|_F^2 + \alpha \sum_{i < j} \|\hat{\mathbf{X}}_{i\cdot} - \hat{\mathbf{X}}_{j\cdot}\|_2 \\ &= \|f(\mathbf{A}) - f(\hat{\mathbf{X}})\|_F^2 + \alpha \sum_{i < j} \|f(\hat{\mathbf{X}}_{i\cdot}) - f(\hat{\mathbf{X}}_{j\cdot})\|_2 \end{aligned}$$

So, we have

$$f(\hat{\mathbf{X}}) = \arg \min_{\mathbf{X} \in \mathbb{R}^{n \times p}} \|f(\mathbf{A}) - \mathbf{X}\|_F^2 + \alpha \sum_{i < j} \|\mathbf{X}_{i\cdot} - \mathbf{X}_{j\cdot}\|_2.$$

Since  $f$  preserves the distance between vectors,  $\mathbf{A}$  and  $f(\mathbf{A})$  have the same cluster-membership in the sense that if  $\mathbf{A}_{i\cdot}$  and  $\mathbf{A}_{j\cdot}$  are from the same cluster  $\mathbb{C}^k$ , then  $f(\mathbf{A}_{i\cdot})$  and  $f(\mathbf{A}_{j\cdot})$  are from the same cluster  $f(\mathbb{C}^k)$ . Because  $\hat{\mathbf{X}}$  is the cluster-membership matrix of  $\mathbf{A}$ ,  $f(\hat{\mathbf{X}})$  is also the cluster-membership matrix of  $\mathbf{A}$ , we conclude that  $f(\hat{\mathbf{X}})$  is the cluster-membership matrix of  $f(\mathbf{A})$ , which means we can determine the cluster-membership of  $f(\mathbf{A})$  correctly. □

## 7 Proof of Theorem 2

Recall that SON in the feature space can be formulated as

$$\begin{aligned} \hat{\mathbf{X}} &= \arg \min_{\mathbf{X} \in \mathbb{R}^{n \times q}} \sum_{i=1}^n (\langle \phi(\mathbf{A}_{i\cdot}), \phi(\mathbf{A}_{i\cdot}) \rangle - 2 \langle \phi(\mathbf{A}_{i\cdot}), \mathbf{X}_{i\cdot} \rangle + \langle \mathbf{X}_{i\cdot}, \mathbf{X}_{i\cdot} \rangle) \\ &\quad + \alpha \sum_{i < j} \sqrt{\langle \mathbf{X}_{i\cdot}, \mathbf{X}_{i\cdot} \rangle - 2 \langle \mathbf{X}_{i\cdot}, \mathbf{X}_{j\cdot} \rangle + \langle \mathbf{X}_{j\cdot}, \mathbf{X}_{j\cdot} \rangle}. \end{aligned} \tag{21}$$

**Theorem 2. (Representation Theorem)** Each row of the optimal solution of Problem (21) can be written as a linear combination of rows of  $\mathbf{A}$ , i.e.,

$$\hat{\mathbf{X}}_{i\cdot} = \sum_{j=1}^n a_{ij} \phi(\mathbf{A}_{j\cdot}).$$

*Proof.* We define the inner product on  $\mathbb{R}^p$  as  $\langle \mathbf{u}, \mathbf{v} \rangle = \mathbf{u}^T \mathbf{v}$  for all  $\mathbf{u}, \mathbf{v} \in \mathbb{R}^p$ . Then,  $\mathbb{R}^p$  is a Hilbert space. Since  $\text{Row}(\mathbf{A})$  is a closed linear subspace of  $\mathbb{R}^p$ , according to the Orthogonal Decomposition theorem, we have

$$\mathbb{R}^p = \text{Row}(\mathbf{A}) \oplus \text{Row}(\mathbf{A})^\perp.$$

So, for each row  $\mathbf{X}_{i\cdot}$  of  $\mathbf{X} \in \mathbb{R}^{n \times p}$ , we can decompose  $\mathbf{X}_{i\cdot}$  into direct sum of two vectors such that one is in  $\text{Row}(\mathbf{A})$ , the other one is in  $\text{Row}(\mathbf{A})^\perp$  i.e.  $\mathbf{X}_{i\cdot} = \mathbf{u} + \mathbf{v}$  such that  $\mathbf{u} \in \text{Row}(\mathbf{A})$  and  $\mathbf{v} \in \text{Row}(\mathbf{A})^\perp$ . Then, we can decompose any  $\mathbf{X} \in \mathbb{R}^{n \times p}$  into sum of two parts  $\mathbf{U}$  and  $\mathbf{V}$  such that  $\mathbf{X} = \mathbf{U} + \mathbf{V}$  and  $\mathbf{U}_{i\cdot} \in \text{Row}(\mathbf{A})$ ,  $\mathbf{V}_{i\cdot} \in \text{Row}(\mathbf{A})^\perp$  for  $i = 1, 2, \dots, n$ .

We now show that the optimal solution  $\hat{\mathbf{X}} \in \text{Row}(\mathbf{A})$  by contraction. Suppose  $\hat{\mathbf{X}} \notin \text{Row}(\mathbf{A})$ , then we decompose  $\hat{\mathbf{X}}$  into sum of two parts  $\hat{\mathbf{U}}$  and  $\hat{\mathbf{V}}$  such that  $\hat{\mathbf{X}} = \hat{\mathbf{U}} + \hat{\mathbf{V}}$ ,  $\hat{\mathbf{U}}_{i\cdot} \in \text{Row}(\mathbf{A})$ ,  $\hat{\mathbf{V}}_{i\cdot} \in \text{Row}(\mathbf{A})^\perp$  for  $i = 1, 2, \dots, n$  and exists  $j$  such that  $1 \leq j \leq n$ ,  $\hat{\mathbf{V}}_{j\cdot} \neq 0$ .

Then, we have

$$\begin{aligned} & \sum_{i=1}^n \left( \langle \phi(\mathbf{A}_{i\cdot}), \phi(\mathbf{A}_{i\cdot}) \rangle - 2 \langle \phi(\mathbf{A}_{i\cdot}), \hat{\mathbf{X}}_{i\cdot} \rangle + \langle \hat{\mathbf{X}}_{i\cdot}, \hat{\mathbf{X}}_{i\cdot} \rangle \right) \\ & + \alpha \sum_{i < j} \sqrt{\langle \hat{\mathbf{X}}_{i\cdot}, \hat{\mathbf{X}}_{i\cdot} \rangle - 2 \langle \hat{\mathbf{X}}_{i\cdot}, \hat{\mathbf{X}}_{j\cdot} \rangle + \langle \hat{\mathbf{X}}_{j\cdot}, \hat{\mathbf{X}}_{j\cdot} \rangle} \\ & = \sum_{i=1}^n \left( \langle \phi(\mathbf{A}_{i\cdot}), \phi(\mathbf{A}_{i\cdot}) \rangle - 2 \langle \phi(\mathbf{A}_{i\cdot}), \hat{\mathbf{U}}_{i\cdot} + \hat{\mathbf{V}}_{i\cdot} \rangle + \langle \hat{\mathbf{U}}_{i\cdot} + \hat{\mathbf{V}}_{i\cdot}, \hat{\mathbf{U}}_{i\cdot} + \hat{\mathbf{V}}_{i\cdot} \rangle \right) \\ & + \alpha \sum_{i < j} \sqrt{\langle \hat{\mathbf{U}}_{i\cdot} + \hat{\mathbf{V}}_{i\cdot}, \hat{\mathbf{U}}_{i\cdot} + \hat{\mathbf{V}}_{i\cdot} \rangle - 2 \langle \hat{\mathbf{U}}_{i\cdot} + \hat{\mathbf{V}}_{i\cdot}, \hat{\mathbf{U}}_{j\cdot} + \hat{\mathbf{V}}_{j\cdot} \rangle + \langle \hat{\mathbf{U}}_{j\cdot} + \hat{\mathbf{V}}_{j\cdot}, \hat{\mathbf{U}}_{j\cdot} + \hat{\mathbf{V}}_{j\cdot} \rangle} \\ & = \sum_{i=1}^n \left( \langle \phi(\mathbf{A}_{i\cdot}), \phi(\mathbf{A}_{i\cdot}) \rangle - 2 \langle \phi(\mathbf{A}_{i\cdot}), \hat{\mathbf{U}}_{i\cdot} \rangle + \langle \hat{\mathbf{U}}_{i\cdot}, \hat{\mathbf{U}}_{i\cdot} \rangle + \langle \hat{\mathbf{V}}_{i\cdot}, \hat{\mathbf{V}}_{i\cdot} \rangle \right) \\ & + \alpha \sum_{i < j} \sqrt{\langle \hat{\mathbf{U}}_{i\cdot}, \hat{\mathbf{U}}_{i\cdot} \rangle + \langle \hat{\mathbf{V}}_{i\cdot}, \hat{\mathbf{V}}_{i\cdot} \rangle - 2 \langle \hat{\mathbf{U}}_{i\cdot}, \hat{\mathbf{U}}_{j\cdot} \rangle - 2 \langle \hat{\mathbf{V}}_{i\cdot}, \hat{\mathbf{V}}_{j\cdot} \rangle + \langle \hat{\mathbf{U}}_{j\cdot}, \hat{\mathbf{U}}_{j\cdot} \rangle + \langle \hat{\mathbf{V}}_{j\cdot}, \hat{\mathbf{V}}_{j\cdot} \rangle} \\ & > \sum_{i=1}^n \left( \langle \phi(\mathbf{A}_{i\cdot}), \phi(\mathbf{A}_{i\cdot}) \rangle - 2 \langle \phi(\mathbf{A}_{i\cdot}), \hat{\mathbf{U}}_{i\cdot} \rangle + \langle \hat{\mathbf{U}}_{i\cdot}, \hat{\mathbf{U}}_{i\cdot} \rangle \right) \\ & + \alpha \sum_{i < j} \sqrt{\langle \hat{\mathbf{U}}_{i\cdot}, \hat{\mathbf{U}}_{i\cdot} \rangle - 2 \langle \hat{\mathbf{U}}_{i\cdot}, \hat{\mathbf{U}}_{j\cdot} \rangle + \langle \hat{\mathbf{U}}_{j\cdot}, \hat{\mathbf{U}}_{j\cdot} \rangle} \end{aligned}$$

which contradicts the optimality of  $\hat{\mathbf{X}}$ . Then, the lemma follows.  $\square$

## References

- [1] Dimitri P Bertsekas. *Convex Optimization Theory*. Universities Press. 7
